# Supplementary material
Source: MDPI journal article supplement (https://www.mdpi.com/2071-1050/10/2/547)
Supplement: s1 [file s1]

## Sheet: LCA
Bibliographic information						Product information		Production information				Method Addressed
																LCA impact category																			Study design
Ref.	Author	Year	Title	Author affiliation (main author country)	Source	Product type (energy/commodity etc)	Product (e.g. FT diesel)	Feedstock (plant (e.g. corn), fraction (e.g. waste/GROT) management (e.g. perennial))	Cultivation location (e.g. Sweden)	Conversion technology (e.g. gazification)	Conversion location (e.g. Sweden)	LCA	LCC	SLCA	LCSA	GWP	Energy Use	AD	AP	EP	OD	POCP	Particles	dLU	dLUC	iLUC	TP	WD	Resource use	Endpoints	Biodegradability	Gross caloric values	Biodiv	Qualitative discussions	Goal/purpose	FU	LCA type?	LCIA Method	Reason for impact category selection?	Boundaries
1	Hammar et al.	2015	Time-Dynamic Effects on the Global Temperature When Harvesting Logging Residues for Bioenergy	Sweden	Scopus	Energy	District heating	Boreal coniferous forest, tree tops and branches	Sweden	Chipping	Sweden	X				1	1	0	0	0	0	0	0	0	1	0	0	0	0	0	0	0	0	However, increasing the harvesting level may affect future forest productivity as a consequence of soil nutrient removal. Moreover, it may have a negative impact on biodiversity.	Study the effects of harvesting logging residues for district heating from a single forest stand and the time-dynamic effects on the global temperature.	1) MJ district heating (heat) generated during one forest rotation, 2) MJ district heating (heat) per hectare of forest area	Attributional	Time-dependent LCA as describe by Ericsson et a. 2013. SOC included in GWP	No	Cradle-to-grave
2	Karlsson et al.	2015	Faba beans for biorefinery feedstock or feed? Greenhouse gas and energy balances of different applications	Sweden	Scopus	Energy	Ethanol and fuel briquettes	Faba bean	Sweden	Biorefining	Sweden	X				1	1	0	0	0	0	0	0	1	1	0	0	0	0	0	0	0	0	SOC loss not only affects emissions of GHG, since SOC is linked to many ecosystem services such as water holding capacity, aggregation formation and nutrient recycling. More research is needed to link residue harvesting, SOC losses and impacts on soil fertility and to develop methods for including these effects in LCA studies.	Assess the climate impact, arable land use and fossil energy use of changing from the current use of faba beans as protein feed to two types of whole FB plant utilization: biorefinery processing and roughage feed	Production of faba beans from 1 ha of land, utilized either as animal protein feed (scenario (I)) or animal roughage (scenario (III)) or as the products from a biorefinery (liquid fuel, protein feed and solid fuel) (scenario (II)).	Consequential	Not mentioned. SOC included in GWP	No	Cradle-to-gate
3	Carlsson et al.	2015	Importance of food waste pre-treatment efficiency for global warming potential in life cycle assessment of anaerobic digestion systems	Sweden	Scopus	Energy	Biogas	Food waste	Sweden	Anaerobic digestion	Sweden	X				1	1	0	0	0	0	0	0	0	0	0	0	0	0	0	0	0	0		Investigate how FW pre-treatment efficiency impacts the environmental performance of waste management, with respect to global warming potential	Pre-treatment of 1 ton food waste intended for biogas production; including anaerobic digestion of the treated biomass, use of biogas, as well as utilization of the pre-treatment and digester residual materials	Consequential	ILCD 2011	No	Well (waste treatment)-to-wheel
4	Heeren et al.	2015	Environmental Impact of Buildings - What Matters?	Switzerland	Scopus	Construction	Residential and office buildings	Wood	Switzerland	Construction	Switzerland	X				1	1	0	0	0	0	0	1	0	0	0	0	0	0	0	0	0	0		Identify drivers of environmental impact and quantify their influence on the environmental performance of wooden and massive residential and office buildings	1 square meter of conditioned floow area averaged for 1 year of service life	Attributional	Cumulative energy demand: CED total, climate change: IPCC 2013 100y, respiratory effects due to particel formation: ReCiPe midpoint h	No	Cradle-to-grave
5	Potting and van der Harst	2015	Facility arrangements and the environmental performance of disposable and reusable cups	Sweden	Scopus	Commodity	Cups	Corn for the bioplastic, not mentioned for the paper	Not mentioned	Not mentioned	Not mentioned	X				1	1	1	1	1	1	1	0	0	0	0	1	0	0	0	0	0	0		Advice facility managers on the sustainable use of cups, either disposable or reusable	Facilitating the serving of one hot beverage from a vending machine	Attributional	CML Baseline 2001, supplemented with the cumulated energy demand (CED) from Frischknecht et al. 2003	Yes	Cradle-to-grave
6	Arvidsson et al.	2015	Life cycle assessment of cellulose nanofibrils production by mechanical treatment and two different pretreatment processes	Sweden	Scopus	Construction and commodity	Nanocellulose	Wood pulp	Sweden and Russia	1), enzymes, 2) carboxymethylation, 3) no pretreatment	Sweden	X				1	1	0	1	0	0	0	0	0	0	0	0	1	0	0	0	0	0	Arguments for not assessing toxicity (the most commonly discussed environmental issue for nanomaterials)	1) Assess the life cycle environmental impacy of the 3 production routes, 2) point to reduction opportunitites, 3) compare results to previous studies	1 kg nanocellulose	Attributional	Energy demand: CED. Others: ReCiPe	Yes	Cradle-to-gate
7	Liptow et al.	2015	Life cycle assessment of biomass-based ethylene production in Sweden — is gasification or fermentation the environmentally preferable route?	Sweden	Scopus	Commodity	Chemical	Tree tops and branches, or mix of less valuable wood fractions	Sweden	1) gasification, 2) fermentation	Sweden	X				1	0	0	1	1	0	1	0	0	0	0	0	0	0	0	0	0	0	Though several methods for the impact assessment of biogenic CO2 have been developed in recent years, they are still subject to intensive and critical methodological debate. For this reason, an application at this point seemed moot. The impact on biodiversity and water availability due to the production of biomass-based ethylene was outside the scope of this study, although we recognize the impor…	Assess and compare a wood gasification with a wood fermentation route to ethylene in Sweden, and compares it with the commercialized sugarcane and fossil oil alternatives.	50,000 t ethylene/year	Attributional	Not mentioned	No	Cradle-to-gate
8	Kimming et al.	2015	Vertical integration of local fuel producers into rural district heating systems - Climate impact and production costs	Sweden	Scopus	Energy	District heating	Salix, straw, forestry and sawmill residues	Sweden	Chipping	Sweden	X	X			1	1	0	0	0	0	0	0	1	1	0	0	0	0	0	0	0	0	It was assumed that Salix would be produced on land that otherwise would be fallow, and iLUC was therefore not assumed to occur.	Analyse the GHG emissions from heat production, as well as the heat price, in scenarios with different level of farmer integration into the supply chain	1 GJ of heat delivered to an end-user	Consequential	Not mentioned. SOC included in GWP	No	Cradle-to-grave
9	Hansson et al.	2015	Greenhouse gas performance of heat and electricity from wood pellet value chains - based on pellets for the Swedish market	Sweden	Scopus	Energy	Pellets for heat and electricity	Various wood products	Sweden, Latvia, Russia, Canada	Drying	Sweden, Latvia, Russia, Canada	X				1	0	0	0	0	0	0	0	0	0	0	0	0	0	0	0	0	0	The results do not include GHG emissions from LUC, carbon stock change in the ecosystems and iLUC, all of which could have an impact on the end result (but there is a lack of established data) The impact of this should be studied further.	Assess GHG emissions for heat and electricity from selected wood pellet value chains for the Swedish market and the related potential emissions reduction using an LCA (life cycle assessment) perspective.	MJ of pellets in fuel terms (and not in heat and electricity terms)	Not mentioned	IPCC (2007)	No	Cradle-to-gate
10	Chiew et al.	2015	Environmental impact of recycling digested food waste as a fertilizer in agriculture - A case study	Sweden	Scopus	Commodity	Fertilizer	Food waste	Sweden	Anaerobic digestion	Sweden	X				1	1	0	1	1	0	0	0	0	1	0	0	0	1	0	0	0	0		Assess the impacts on the environment and resources of using digested food waste as fertilizer and to compare these impacts with those of using chemical fertilizer	The production, handling and spreading of a fertilizer containing 1 kg plant-available nitrogen and 0.20 kg phosphorus after spreading on arable land	Not mentioned. But system expansion applied	GWP: IPCC 2006 (C increase in soil included), EP and AP: CML 2001, En: CED	Yes	Cradle (waste collection)-to-grave
11	Börjesson et al.	2015	Energy crop-based biogas as vehicle fuel-the impact of crop selection on energy efficiency and greenhouse gas performance	Sweden	Scopus	Energy	Biogas	Agriculture crops. Ley, maize, wheat, hemp, triticale, sugar beet	Sweden	Anaerobic digestion	Sweden	X				1	1	0	0	0	0	0	0	0	1	0	0	0	0	0	0	0	0	iLUC excluded because (i) the crops are cultivated on existing farmland - will have similar displacement impact, (ii) general scientific uncertainties with iLUC. Future studies should also include additional sustainability criteria, such as biodiversity, eutrophication etc., to complete the picture even further.	Assess the primary energy and GHG efficiency from field to fuel for six crops investigated, and analyse the impact on the results of the calculation method used and other critical parameters	1 GJ of upgraded and pressurised biogas	Not mentioned. But one case with system expansion	Not mentioned except from biogenic N2O: IPCC. SOC included in GWP (with ICBM). In one case: RED is used	No	Well-to-tank
12	Martin	2015	Quantifying the environmental performance of an industrial symbiosis network of biofuel producers	Sweden	Scopus	Energy	Ethanol and biogas	Grains	Sweden	Biogas: anaerobic digestion. Ethanol: fermentation	Sweden	X				1	0	0	0	0	0	0	0	0	0	0	0	0	0	0	0	0	0		Contribute to the industrial symbiosis and biofuel literature by applying a previously published approach to assess the environmental performance of an industrial symbiosis network in the biofuel industry. Illustrate the effects of influential methodological considerations and explore the implications of the distribution of the benefits and impacts to firms of the industrial symbiosis network for…	The annual production in energy production of ethanol and biogas	Not mentioned. But system expansion applied	EPD 2008	Yes	Cradle-to-gate
13	Ahmadi Moghaddam et al.	2015	Energy balance and global warming potential of biogas-based fuels from a life cycle perspective	Sweden	Scopus	Energy	Compressed biogas, liquified biogas, Fischer-Tropsch diesel, methanol, dimethyl ether	Not mentioned	Not mentioned	Upgrading of biogas	Not mentioned	X				1	1	0	0	0	0	0	0	0	0	0	0	0	0	0	0	0	0		Assess alternative biogas processing routes in terms of their energy efficiency and global warming potential (GWP) in a life cycle perspective	1 Nm3 raw biogas produced by anaerobic digestion	Attributional	GWP: IPCC 2007	No	Factory (raw biogas upgrading)-to-wheel
14	Janssen et al.	2014	Influence of high gravity process conditions on the environmental impact of ethanol production from wheat straw	Sweden	Scopus	Energy	Ethanol	Wheat straw	Denmark	Hydrolysis and fermentatioon at high gravity conditions	Denmark	X				1	1	0	1	1	0	1	0	0	0	0	0	0	0	0	0	0	0		Assess the environmental impact of high gravity conditions during the hydrolysis and fermentation steps in an ethanol production process with wheat straw as the feedstock, at a very early development stage. Guide the development of the technology for high gravity hydrolysis and fermentation by providing technology developers, researchers and industry decision makers the environmental hotspots fro…	1 l of ethanol produced from wheat straw by a process system that uses the high gravity hydrolysis and fermentation technology	Attributional	CML. En: CED (REU + NREU)	Yes	Cradle-to-gate
15	Holmgren et al.	2014	The influence of biomass supply chains and by-products on the greenhouse gas emissions from gasification-based bio-SNG production systems	Sweden	Scopus	Energy	Biobased SNG	Forest residues (Sweden), pellets (others)	Sweden, Canada, Latvia	Gasification	Sweden	X				1	0	0	0	0	0	0	0	0	1	0	0	0	0	0	0	0	0	Differences in the forestry systems (rotation lengths, harvesting systems, fertilising, indirect land use changes, etc.) were not investigated or considered	Describe and identify important parameters for the GHG emission reduction potential of a biomass gasification-based SNG production system	Not mentioned	Consequential	IPCC. SOC included in GWP	No	Cradle-to-grave
16	Ericsson et al.	2014	Climate impact and energy efficiency from electricity generation through anaerobic digestion or direct combustion of short rotation coppice willow	Sweden	Scopus	Energy	Electricity and heat	Short rotation coppice willow	Sweden	1) direct combustion in central CHP plant, 2) burnig biogas in small scale CHP plant	Sweden	X				1	1	0	0	0	0	0	0	0	1	0	0	0	0	0	0	0	0	If the demand for bioenergy sector products increases, it is possible that the profitability of bioenergy plantations might surpass those of conventional crops on primary farmland. If that is the case, the consequences of indirect land use change (iLUC) have to be taken into account when determining the possible consequences of choosing biogas over direct combustion	Compare the energy efficiency and climate impact of two ways of generating electricity and heat from SRC willow	Per hectare basis for heat and electricity and converted to per kWh of electricity delivered	Not mentioned	Time dependency assessed with the global mean surface temperature change (ΔTS). SOC included in GWP	No	Cradle-to-gate
17	Porsö and Hansson	2014	Time-dependent climate impact of heat production from Swedish willow and poplar pellets - In a life cycle perspective	Sweden	Scopus	Energy	District heating	Willow and poplar	Sweden	Pelleting	Sweden	X				1	1	0	0	0	0	0	0	0	1	0	0	0	0	0	0	0	0	Since the site used for willow and poplar cultivation was assumed to have been under fallow since the 1990s, no indirect land use changes (ILUC) effects were included in the study.	Examine the environmental effects of increased production of pellets from new domestic raw materials in Sweden.	1 GJ heat produced at a regional DH plant using willow or poplar pellets	Not mentioned	Normal GWP (IPCC) + Time dependency assessed with the global mean surface temperature change (ΔTS). SOC included in GWP	No	Cradle-to-grave
18	Njenga et al.	2014	Additional cooking fuel supply and reduced global warming potential from recycling charcoal dust into charcoal briquette in Kenya	Kenya	Scopus	Energy	Briquettes	Charcoal dust from woody savannah (Acacia drepanolobium )	Kenya	Carbonization	Kenya	X				1	0	0	0	0	0	0	0	1	0	0	0	0	0	0	0	0	0	There is also a need to assess the health implications of cooking with the three fuels studied. Temporal aspects of GHG emissions and CO2 sequestration should be taken into account. Only CO2 uptake from harvested biomass was included, which is an implicit assumption that there is no net uptake or loss of C in soils or vegetation in these forest systems. This is a simplistic assumption, and better…	Quantify the potential benefits from recycling charcoal dust into charcoal briquettes regarding reduction of GHG emissions and increased cooking fuel supply	Fuel used in cooking a traditional meal – a mixture of 500 g of green maize and 500 g of dry common beani – for a standard Kenyan household of five people	Not mentioned	Not mentioned	No	Cradle-to-grave
19	Brynolf et al.	2014	Environmental assessment of marine fuels: Liquefied natural gas, liquefied biogas, methanol and bio-methanol	Sweden	Scopus	Energy	Liquified biogas and biomethanol	Willow and forest residues	Not mentioned	LBG: gasification, synthesis and liquefaction	Not mentioned	X				1	1	0	1	1	0	1	1	0	0	0	0	0	0	0	0	0	0	Greenhouse gas emissions connected to land use change are not considered in this study as there is no method consensus, but work is ongoing	Compare the life cycle environmental performance in terms of methane, the energy carrier in LNG, and methanol as marine fuels, considering both natural gas and biomass as raw materials	Transportation of 1 t cargo 1 km with a ro–ro vessel	Not mentioned	ILCD. Energy: Total extracted energy as defined by Arvidsson et al. (2012)	No	Tank-to-propeller
20	Tidåker et al.	2014	Rotational grass/clover for biogas integrated with grain production - A life cycle perspective	Sweden	Scopus	Energy	Biogas	Perennial grass/clover ley + spring barley and winter wheat	Sweden	Anaerobic digestion	Sweden	X				1	1	0	1	1	0	0	0	1	1	1	0	0	0	0	0	0	0	Diverse crop rotation can overcome problems with impact on biodiversity and ecosystem services, and soil carbon loss, from monocultural cereal production	Evaluate the environmental impact of grain production when rotational grass/clover for anaerobic digestion is included in a cereal cropping system	1 tonne of harvested grain at the farm gate	Not mentioned. But system expansion applied	GWP: IPCC 2007 (SOC included with the ICBM model. iLUC included with sensitivity analysis with Audsley et al.), EP: Guinée et al. 2002. AP: european average factors	No	Well-to-pump
21	Karlsson et al.	2014	Ethanol production in biorefineries using lignocellulosic feedstock – GHG performance, energy balance and implications of life cycle calculation methodology	Sweden	Scopus	Energy	Ethanol	Straw and forest residues	Sweden	Hydrolysis and fermentation	Sweden	X				1	1	0	0	0	0	0	0	0	1	0	0	0	0	0	0	0	0		Analyze the GHG performance and energy balance of ethanol co-production with biogas and electricity in a biorefinery	1 MJ based on the lower heating value (LHV) ethanol co-produced in a biorefinery with the co-products biogas, electricity and heat	Not mentioned. But system expansion applied in the non-RED case (ISO)	SOC included in the non-RED case (ISO)	No	Well-to-tank
22	Martin et al.	2014	Quantifying the environmental performance of integrated bioethanol and biogas production	Sweden	Scopus	Energy	Bioethanol and biogas	Grains	Sweden	Fermentation and anaerobic digestion	Sweden	X				1	0	0	1	1	0	0	0	0	0	0	0	0	0	0	0	0	0		Outline and present the environmental impacts of several symbiotic activities, i.e. integrated scenarios, between the bioethanol and biogas facilities located on the island of Händelö, Norrköping in order to identify under what conditions increasing integration and using by-products from the ethanol plant for biogas production leads to reduced environmental impacts	The total output of ethanol per year	Not mentioned. But system expansion applied	EPD 2008	Yes	Well-to-tank
23	Hammar et al.	2014	Climate Impact of Willow Grown for Bioenergy in Sweden	Sweden	Scopus	Energy	Distrcit heating	Short-rotation coppice willow	Sweden	Chipping	Sweden	X				1	1	0	0	0	0	0	0	0	1	0	0	0	0	0	0	0	0		Evaluate: (1) key factors influencing the climate change mitigation potential of SRCW grown on agricultural land in Sweden, (2) the potential to store soil organic carbon and create a carbon sink and (3) the sensitivity of the models used to calculate carbon and climate effects.	1 ha of arable land	Not mentioned	Climate change: normal GWP + time-dependent methodolology by Ericsson et al. (2013) (ΔTs). SOC included. EN: Life cycle efficiency + energy ratio	No	Cradle-to-grave
24	Eriksson et al.	2014	Integrated waste management as a mean to promote renewable energy	Sweden	Scopus	Energy and commodity	Biogas, pellets	Municipal solid waste	Sweden	Different upgrading technologies	Sweden	X	X			1	0	0	1	1	0	0	0	0	0	0	0	0	0	0	0	0	0		Evaluate new waste treatment options for municipal and industrial waste from a system perspective	Not mentioned	Not mentioned	Not mentioned	No	Cradle-to-grave
25	Lantz and Börjesson	2014	Greenhouse gas and energy assessment of the biogas from co-digestion injected into the natural gas grid: A Swedish case-study including effects on soil properties	Sweden	Scopus	Energy	Biogas	Manure and various food industry wastes	Sweden	Anaerobic digestion and biogas upgrading	Sweden	X	X			1	1	0	0	0	0	0	0	0	1	0	0	0	0	0	0	0	0		Analyse the energy and GHG performance for this particular biogas plant from a life cycle perspective based on measured, site-specific data. Identify potential technical improvements which could lead to further GHG reductions, and the cost of such measures.	1 MJ upgraded and compressed vehicle gas distributed via the natural gas grid	Not mentioned. But system expansion applied	Not mentioned. SOC included in GWP and analysed with novel approach. Increased soil compaction from digestate is also included	No	Well (waste collection)-to-pump
26	Bengtsson et al.	2014	Fuels for short sea shipping: A comparative assessment with focus on environmental impact	Sweden	Scopus	Energy	Biomass-to-liquid gas, RME, liquefied biogas	Woody biomass, waste and residues, crops	Not mentioned	Various	Not mentioned	X				1	0	0	1	1	0	1	0	0	0	0	1	0	0	0	0	0	0		Assess what characteristics are important to evaluate when selecting fuels for short sea shipping with special emphasis put on environmental characteristics	1 t cargo transported one km with a ro-ro-vesseö	Not mentioned	GWP: IPCC 2007. AP and EP: Huijbregts et al. (2000), CML. Human health: CML, van Zelm et al. (2006). POCP: Hauschild et al. (2006).	No	Cradle-to-propeller
27	van der Harst et al.	2014	Multiple data sets and modelling choices in a comparative LCA of disposable beverage cups	Netherlands	Scopus	Commodity	Cups	Corn for the plastic, wood for paper	Not mentioned	Plastic: thermoforming, paper: punching, folding and gluing	Not mentioned	X				1	1	1	1	1	1	1	0	0	0	0	1	0	0	1	0	0	0	The current feedstock for PLA might induce iLUC. Second and third generation materials could decrease this. Monoculture of specific trees creates biodiversity loss. Recycling is important to reduce both impacts	Compare the environmental impact of disposable petro-plastic beverage cups with biocups through LCA using multiple data sets and modelling choices	The provision of a disposable beverage cup fit for serving 180 ml hot drinks by vending machines	Not mentioned. But system expansion applied	CML 2000 + CED for energy	No	Cradle-to-grave
28	Wang et al.	2013	Microalgal biomethane production integrated with an existing biogas plant: A case study in Sweden	China	Scopus	Energy	Biomethane	Microalgae	Sweden	Anaerobic digestion	Sweden	X				1	1	0	0	0	0	0	0	1	0	0	0	0	0	0	0	0	0		Not mentioned	1 GJ of produced biomethane	Not mentioned	Not mentioned	No	Cradle-to-gate
29	Tufvesson et al.	2013	Economic and environmental assessment of propionic acid production by fermentation using different renewable raw materials	Sweden	Scopus	Commodity	Chemical (proponic acid)	Glycerol from rapeseed (biproduct from RME production), sugar beets (sugar and molasses), and potato juice	Rapeseed: Denmark and Belgium, Sugar beet: Sweden	Fermentation	Sweden	X	X			1	0	0	0	0	0	0	0	0	1	0	0	0	0	0	0	0	0	Generally, eutrophication, acidification and water use are important impacts for biobased products, but were not assessed	Identify the critical process parameters and to investigate the impact of these for the production of propionic acid on both the environmental impact, with focus on greenhouse gas performance, as well as the production costs	1 tonne of propionic acid at the factory gate	Not mentioned	Not mentioned. SOC included in GWP	No	Cradle-to-gate
30	Ekman et al.	2013	Bioresource utilisation by sustainable technologies in new value-added biorefinery concepts - Two case studies from food and forest industry	Sweden	Scopus	Commodity	Chemicals (quercetin and betulin)	Quercetin: onion waste, betulin: birch bark	Sweden	Quercetin: extraction and hydrolysis, Betulin: extraction	Sweden	X				1	1	0	0	0	0	0	0	0	0	0	0	0	0	0	0	0	0	Residues are interesting since they do not lead to iLUC	Not mentioned	1 ton of onion waste	Not mentioned	Not mentioned	No	Gate-to-gate
31	Tufvesson et al.	2013	Environmental performance of biogas produced from industrial residues including competition with animal feed - Life-cycle calculations according to different methodologies and standards	Sweden	Scopus	Energy	Biogas	Industrial residues.distiller's waste, rapeseed cake, whey permeate, fodder milk and bakery residues	Sweden	Anaerobic digestion	Sweden	X				1	1	0	1	1	0	0	0	0	1	0	0	0	0	0	0	0	0	Residues can cause iLUC depending ont the potentiallternative use (as show in the paper)	Show the environmental performance of the investigated biogas systems and the impact on the result due to the choice of calculation method.	Enviromentalperformance per MJ of upgraded and compressed biogas	Attributional + system expansion	GWP: IPCC 2006, EP and AP: Baumann and CML 2002. SOC included in GWP (RED)	No	Well (waste collection)-to-factory gate (distribution not included)
32	Hagman et al.	2013	Do biofuels require more water than do fossil fuels? Life cycle-based assessment of jatropha oil production in rural Mozambique	Sweden	Scopus	Energy	Jatropha oil (used as fuel)	Jatropha	Mosambique	Cracking, drying, pressing	Mosambique	X				1	1	0	0	0	0	0	0	0	0	0	0	1	0	0	0	0	0	It should be mentionedthat wen growing a crop, the net change in carbon stck of the cultivation affects the GWP. However,as such calculations remain uncertain andmore established methods are needed, they are not considered in this study. GWP from LU, LUC and iLUC not included	Contribute to the understading of the environmental life cycle performance of jattropha, in particular regarding water use	1 MJ of jatropha oil	Not mentioned	WD: the blue water footprint, the green water footprint, the stress weighted blue water footprint, and blue water formation. GWP: IPCC 2007	Yes	Well-to-wheel
33	Liptow et al.	2013	Ethylene based on woody biomass - What are environmental key issues of a possible future Swedish production on industrial scale	Sweden	Scopus	Commodity	Ethylene	Sawmill residues	Sweden	Fermentation to ethanol and dehydration	Sweden	X				1	0	0	1	1	0	1	0	0	0	0	0	0	0	0	0	0	0	iLUC can be bad for sugarcane ethanol, therefore good to look at alternative feedstock	Assess the environmental impact of a possible future-state in which ethylene is produced from sawmill chips at an industrially relevant scale, with focus on the identification of possible environmental key contributors	50 000 t ethylene/year	Attributional	Not mentioned	No	Cradle-to-gate
34	González-García et al.	2013	Life cycle assessment of potential energy uses for short rotation willow biomass in Sweden	Spain	Sweden	Energy	Ethanol (fuel) or heat from direct chips combustion	Short rotation willow chips	Sweden	Ethanol: fermentation. Heat: chips burning	Sweden	X				1	0	1	1	1	1	1	0	0	0	0	1	0	0	0	0	0	0	Mentiones particles (important with better combustion technologies) and that the biomass type is good for land use change and biodiversity.But is in the introduction, not discussed with regards to the specific case	Evaluate the environmental impacts of two bioenergy systems from willow biomass and their comparison with conventional energy systems	1) 1 km distance driven, 2) 1 MJ of heat released from the combustion of willow chips and natural gas, respectively	Not mentioned	CML 2 2000	No	Cradle-to-grave
35	La Rosa et al.	2013	Life cycle assessment of a novel hybrid glass-hemp/thermoset composite	Italy	Scopus	Construction	Pipe	Hemp	UK	Wrapping and curing	Italy	X	X			1	1	0	0	0	0	0	0	1	0	0	0	0	0	1	0	0	0	Rotating crops (like hemps) have soil benefits (e.g.increase in soil organic matter)	Evaluate the eco-efficiency of using hemp mats in the proposed hybrid thermoset material	The function of one elbow fitting used in the sea water cooling pipeline of a Sicilian chemical plant, with an estimated life of 20 years	Not mentioned	Human health, ecosystem quality, resources, agriculturl land occupation: Recipe endpoint (H). Global energy requirement:CED. GWP: IPCC 2007.	No	Cradle-to-grave
36	Sparrevik et al.	2013	Life cycle assessment to evaluate the environmental impact of biochar implementation in conservation agriculture in Zambia	Norway	Scopus	Commodity	Biochar	Maize cobs	Zambia	1) traditional eath-mound kilns, 2)improved retort kilns,3) micro top-liftupdraft	Zambia	X				1	1	0	0	0	0	0	1	0	0	0	0	0	0	1	0	0	0	Assumed steady statewlevels, meaning no differencein SOC releaseor uptake. ReCiPe does not cover the climate effect of particulate matter	Compare the environmental impact of conservation farming to that of conventional farming and to estimate whether biochar produced through different methods may prove beneficial in a complete life-cycle perspective	Impact per produced ton of maize per year	Not mentioned	ReCiPe (H)+ normalization to ecopoints	No	Cradle-to-grave
37	Liptow et al.	2012	A Comparative Life Cycle Assessment Study of Polyethylene Based on Sugarcane and Crude Oil	Sweden	Scopus	Commodity	Polyethylene	Sugarcane	Brazil	Fermentation, dehydration and polymerization	Brazil	X				1	1	0	1	1	0	1	0	0	1	1	0	0	0	0	0	0	0		Investigate the most important contributors to the environmental impact of renewable, sugarcane-based LDPE and to then compare the results with fossil based LDPE.	1 kg LDPE at the gate of the PE production plant	Both	Not mentioned	No	Cradle-to-gate
38	Bengtsson et al.	2012	Environmental assessment of two pathways towards the use of biofuels in shipping	Sweden	Scopus	Energy	Biofuel and liquified biogas	Biofuel: Rape seed. Biogas: agricultural waste, manure and municipal organic waste	Sweden	Not mentioned	Sweden	X				1	1	0	1	1	0	0	1	1	0	0	0	0	0	0	0	0	0		Evaluate the life cycle performance of two alternative routes toward biofuels in the shipping industry: the diesel route and the gas route.	1 year of ro-pax ferry service, including both passenger and goods transportation	Consequential	GWP: IPCC 2007, AP and EP: Huijbregts et al. 2000	No	Well-to-wheel
39	González-García et al.	2012	Environmental assessment of energy production based on long term commercial willow plantations in Sweden	Spain	Scopus	Energy	Chips dedicated to energy	Short rotation willow chips	Sweden	Cutting	Sweden	X				1	1	1	1	1	1	1	0	0	0	0	1	0	0	0	0	0	0	We have assumed zero change in the overall soil carbon content under the willow cultivation regimes due to the specific dependency of this on factors such as management practices, climate, previous cropping regime etc.	Analyze the environmental effects of willow cultivation when established at a large scale based on the Swedish case with commercial plantations.	1 hectare of willow plantation under the defined management practices	Attributional	En: CED	No	Cradle-to-gate
40	Lindholm et al.	2011	Greenhouse gas balance of harvesting stumps and logging residues for energy in Sweden	Sweden	Scopus	Energy	Fuel and electricity	Stumps and logging residues from the forest	Sweden	Cutting	Sweden	X				1	0	0	0	0	0	0	0	0	1	0	0	0	0	0	0	0	0		Evaluate the GHG balance of different forest fuel procurement systems with respect to their geographical location, technology used, resource use (stumps and logging residues) and biological production potential	1 MJ of forest fuel and 1 MJ of electricity generatedfrom forest fuels in the form of stumps or logging residues	Not mentioned. But system expansion applied	Time dynamics of carbon flows accounted for based on differentmodels. SOC includedin GWP	No	Cradle-to-grave
41	Wallhagen	2011	Basic building life cycle calculations to decrease contribution to climate change - Case study on an office building in Sweden	Sweden	Scopus	Construction	Office buildings	Wood	Not mentioned	Not mentioned	Not mentioned	X				1	1	0	0	0	0	0	0	0	0	0	0	0	0	0	0	0	0		Examine how energy use and climate change contributions can be reduced by decisions taken in early building design phases	Not used	Not mentioned	Not mentioned	No	1) production of construction materials, 2) energy use for building operation
42	Khatiwada and Silveira	2011	Greenhouse gas balances of molasses based ethanol in Nepal	Sweden	Scopus	Energy	Ethanol	Molasses from sugar cane	Nepal	Fermentation	Nepal	X				1	0	0	0	0	0	0	0	0	0	0	0	0	0	0	0	0	0	Introduction: dsicussion about the significante og LUC and iLUC and arguments for why not included	Not mentioned	1 m3 ethanol	Not mentioned. One scenario with system expansion	IPCC (2007)	No	Well-to-wheel
43	Spångberg et al.	2011	Environmental impact of meat meal fertilizer vs. chemical fertilizer	Sweden	Scopus	Commodity	Fertilizer	Meat meal	Sweden	Not mentioned	Sweden	X				1	1	1	1	1	0	0	0	1	0	0	0	0	0	0	0	0	0		Assess and compare the environmental impact of two different systems for handeling and disposing of animal by-product Category 2	1 kg of harvested spring wheat combined with the treatment of 0,59 kg og animal by-product Category 2	Not mentioned. But system expansion applied	GWP and AP: Guinée (2002)	No	Cradle-to-grave
44	González-García et al.	2011	Environmental Life Cycle Assessment of a Swedish Dissolving Pulp Mill Integrated Biorefinery	Spain	Scopus	Commodity	Pulp	Spruce and pine wood	75% Sweden, 25% Baltic countries	Pulping	Sweden	X				1	0	1	1	1	1	1	0	0	0	0	1	0	0	0	0	0	0		Assess and identify the environmental burdens associated with dissolving pulp manufacture in Sweden from a blend of spruce and pine wood by a total chlorine-free (TCF) bleaching process, using hydrogen peroxide (H2O2) as a bleaching agent in a closed-loop bleach (CLB) plant.	1 t of air-dried (10% moisture content), high-quality dissolving cellulose from a blend of pine (20%) and spruce (80%)	Not mentioned	CML 2000	No	Cradle-to-gate
45	Ekman and Börjesson	2011	Environmental assessment of propionic acid produced in an agricultural biomass-based biorefinery system	Sweden	Scopus	Commodity	Propionic acid	Glycerol (by-product from biodiesel production) and potato juice (by-product from starch production)	Sweden	Fermentation	Sweden	X				1	1	0	0	1	0	0	0	0	1	0	0	0	0	0	0	0	0	iLUC excluded because the cultivation is an already existing production system. And there is a lack of scientific and methodological consensus	Investigate the environmental performance of the chemicals produced in the biorefinery compared to chemicals produced from fossil sources by currently conventional methods	1 kg of propionic acid at the factory gate	Attributional	Not mentioned. SOC included in GWP	No	Cradle-to-gate
46	Ekman and Börjesson	2011	Life cycle assessment of mineral oil-based and vegetable oil-based hydraulic fluids including comparison of biocatalytic and conventional production methods	Sweden	Scopus	Commodity	Hydraulic fluid	Rapeseed	Denmark	Chemical and enzymatic process	Not mentioned	X				1	1	0	1	1	0	1	0	0	0	0	0	0	0	0	1	0	0	Ecotoxicity is also an important environmental aspect but is probably connected with the additives to lubricants, which are not included in this study. LUC not considered as tehre is no land conversion	Investigate the evironmental impact of two types of hydraulic fluids, one based on mineral oil and one on vegetable oil	1 l of base fluid for hydraulic fluids	Not mentioned	IPCC (2006) and Solomon et al. (2007)	No	Cradle-to-gate
47	Kimming et al.	2011	Biomass from agriculture in small-scale combined heat and power plants - A comparative life cycle assessment	Sweden	Scopus	Energy	Power and heat from biogas or direct combustion	Ley, straw, and willow chips	Sweden	Gasification or direct combustion	Sweden	X				1	1	0	1	0	0	0	0	1	1	0	0	0	0	0	0	0	0		Draw conclusions on which system that is preferable with respect to fossil energy requirement (FER), primary energy requirement (PER), land use (LU), global warming potential (GWP) and acidification potential (AP)	1 year supply of heat (including hot water) and electricity to a modern village of 150 households	Consequential	Not mentioned. SOC included in GWP	No	Cradle-to-grave
48	Suer and Andersson-Sköld	2011	Biofuel or excavation? - Life cycle assessment (LCA) of soil remediation options	Sweden	Scopus	Energy	Biofuel (unspecified)	Willow	Sweden	Not mentioned	Not mentioned	X				1	0	0	1	1	1	1	0	0	0	0	0	0	0	1	0	1	0		1) Investigate the extend of the environmental benefit of biomass production in comparison with the current Swedish practice of excavation. 2) Identify the processes that caused the major environmental impact, since if those processes can be improved, this is most likely to increase environmental efficiency.	1 site (5000 m2)	Not mentioned	ReCiPe (endpoint h) + EPD	No	Cradle-to-gate
49	Arvidsson et al.	2011	Life cycle assessment of hydrotreated vegetable oil from rape, oil palm and Jatropha	Sweden	Scopus	Energy	HVO (vehicle fuel)	Rapeseed, oil palm, and jatropha	Germany, Malaysia, and India	Hydrotreatment	Finland	X				1	1	0	1	1	0	0	0	0	0	0	0	0	0	0	0	0	0	Land use was excluded in order to facilitate comparison with other studies	Investigate the environmental impact of HVO combusted in heavy-duty trucks using pure HVO as fuel	1 kWh energy out from the engine of a heavy-duty truck	Not mentioned	Not mentioned	Yes	Well-to-wheel
50	Groot and Borén	2010	Life cycle assessment of the manufacture of lactide and PLA biopolymers from sugarcane in Thailand	Netherlands	Scopus	Commodity	Lactides and PLA biopolymers	Sugarcane	Thailand	Fermentation	Thailand	X				1	1	1	1	1	0	1	0	1	0	0	1	0	0	0	0	0	0		1) Quantify the potential environmental impacts associated with the forthcoming production of lactide from sugarcane in Thailand, and the production of PLLA, PDLA, nPLA, and scPLA, 2) Compare the potential environmental impacts of Purac’s biopolymers with that of fossil based polymers on a weight by weight basis, 3) Identify the critical environmental aspects in Purac’s production chain for syste…	1 tonne of material at the factory gate in Thailand	Not mentioned. But system expansion applied	GWP values: IPCC 2007. Other values: Guinée et al. 2002	No	Cradle-to-gate
51	Ahlgren et al.	2010	Nitrogen fertiliser production based on biogas - Energy input, environmental impact and land use	Sweden	Scopus	Commodity	Fertilizer	Ley grass and maize	Sweden	Anaerobic digestion	Sweden	X				1	1	0	1	1	0	0	0	1	0	0	0	0	0	0	0	0	0		Investigate the land use, environmental impact and fossil energy use when using biogas instead of natural gas in the production of nitrogen fertilisers	1 kg of nitrogen	Not mentioned	GWP: IPCC 2001, AP and EP: Lindfors et al. 1995	No	Cradle-to-gate
52	Lindholm et al.	2010	Energy efficiency and the environmental impact of harvesting stumps and logging residues	Sweden	Scopus	Energy	Wood chips	Stumps and logging residues from the forest	Sweden	Chipping	Sweden	X				1	1	0	1	1	0	0	0	0	0	0	0	0	0	0	0	0	0	Soil carbon dynamics could be affected. This will be examined in further work.	Evaluate the primary energy input and related environmental impact for different forest bioenergy production systems	1 MJ dry matter, the estimated lower heating value of fuel chips from logging residues or stumps from final felling delivered to the energy plant	Not mentioned	Not mentioned	No	Cradle-to-gate
53	Ahlgren et al.	2009	Tractive power in organic farming based on fuel cell technology - Energy balance and environmental load	Sweden	Scopus	Energy	Hydrogen and methanol	Straw, salix, ley	Sweden	Thermochemical gasification, anaerobic digestion	Sweden	X				1	1	0	1	1	0	0	0	1	0	0	0	0	0	0	0	0	0	Since the organic soil carbon content was difficult to assess, we decided to only include the possible changes in the sensitivity analysis	Investigate the potential environmental impact, energy balance and land use for an organic farm assumed to be self-sufficient in renewable fuel used in fuel cell powered tractors on the farm	The amount of motor fuel needed to cultivate 1000 ha of a given organic crop rotation during one year	Not mentioned	GWP: IPCC 2001, AP and EP: Lindfors et al. 1995	No	Cradle-to-grave
54	González-García et al.	2009	Evaluation of forest operations in Spanish eucalypt plantations under a life cycle assessment perspective	Spain	Scopus	Commodity	Pulwood	Eucalyptus	Spain	Forestry	Spain	X				1	0	0	1	1	0	1	0	0	0	0	0	0	0	0	0	0	0	Because of lack of relevant data, the paper does not include the effects of land clearing and carbon emissions due to soil processes during the management of the forest plantations	Identify the hot spots in Spanish forest operations for pulpwood production, in order to propose improvement opportunities	1 m3 (40% humidity) of industrial round pulpwood under bark (m3 s.u.b.) delivered to the pulpmill	Not mentioned	Not mentioned	No	Cradle-to-gate (delivery at factory gate)
55	González-García et al.	2009	Environmental impacts of forest production and supply of pulpwood: Spanish and Swedish case studies	Spain	Scopus	Commodity	Pulpwood	Eucalyptus, Norway spruce and Scots pine	Spain and Sweden	Forestry	Spain and Sweden	X				1	0	0	1	1	0	1	0	0	0	0	0	0	0	0	0	0	0	It was not possible to find a common method with equivalent data quality that can reflect land use and biodiversity in a comparable way	Identify and compare the environmental burdens from forest operations in Sweden and Spain focused on pulpwood production and supply to pulp mills	1 m3 of industrial pulpwood solid under bark (m3 s.u.b.) delivered to pulp mill	Not mentioned	GWP: IPCC 2007	No	Cradle-to-gate (delivery at factory gate)
56	Luterbacher et al.	2009	Hydrothermal gasification of waste biomass: Process design and life cycle asessment	Switzerland	Scopus	Energy	Methane	Wood waste and manure	Switzerland	Anaerobic digestion, gasification	Switzerland	X				1	0	0	0	0	0	0	0	0	0	0	0	0	0	0	0	0	0		Identify the environmental hot-spots of the process and to evaluate its environmental performance with respect to its direct competitors	MJ of SNG brought to the Swiss network	Not mentioned	GWP: IPCC 2001	No	Cradle-to-gate
57	Ahlgren et al.	2008	Ammonium nitrate fertiliser production based on biomass - Environmental effects from a life cycle perspective	Sweden	Scopus	Commodity	Fertilizer	Cereal straw and short rotation willow (Salix) coppice	Sweden	Thermochemical gasification	Sweden	X				1	1	0	1	1	0	0	0	1	0	0	0	0	0	0	0	0	0	There can be drawbacks with using straw, e.g. an increased risk of soil erosion and a decline in soil organic matter and carbon content. However, these parameters are very difficult to assess, and we therefore opted not to include soil carbon changes in the calculations.	Evaluate the environmental impact, fossil energy input and land use of producing nitrogen fertilisers from gasified biomass compared with conventional production from natural gas	1 kg of fertiliser nitrogen, as ammonium nitrate (3 kg, 33.5% N) at the gate of the production facility	Not mentioned	EP, AP: Lindfors et al 1995. GWP: IPCC 2001	No	Cradle-to-gate
58	Tufvesson and Börjesson	2008	Wax production from renewable feedstock using biocatalysts instead of fossil feedstock and conventional methods	Sweden	Scopus	Construction	Wood coating wax	Rapeseed oil	Sweden	Hydrogenation, hydrolysis, fractionation, reduction, synthesis	Sweden	X				1	1	0	1	1	0	1	0	0	0	0	0	0	0	0	0	0	0		1) Compare the environmental performance of a wax ester, behenyl behenate with ordinary paraffin wax produced from fossil oil. 2) identify the steps in the life cycle which give rise to the most significant environmental impact (hot spots) and to suggest improvements in the systems studied	1 kg wax product ready to use in a wood coating product	Not mentioned	Not mentioned	No	Cradle-to-gate
59	Eriksson et al.	2007	Life cycle assessment of fuels for district heating: A comparison of waste incineration, biomass- and natural gas combustion	Sweden	Scopus	Energy	District heating	Waste (household, industry, demolition) and forest biomass	Sweden	Incineration	Sweden	X				1	1	0	0	0	0	0	0	0	0	0	0	0	0	0	0	0	0		1) Compare district heating based on waste incineration with combustion of biomass or natural gas, 2) test a combination of dynamic energy system modelling and LCA	42 PJ of district heat	Consequential	CML 2000	No	Cradle-to-grave
60	Gustafsson and Börjesson	2007	Life cycle assessment in green chemistry: A comparison of various industrial wood surface coatings	Sweden	Scopus	Construction	Wood surface coating	Rapeseed oil	Sweden	Biocatalytic processes	Sweden	X				1	0	0	1	1	0	1	0	0	0	0	1	0	0	0	0	0	0		1) Compare four different surface coatings used on wood furniture, 2) Identify the steps of the life cycle which have the greatest environmental impact, and 3) propose improvements and optimise the system	Decoration and protection of 1 m2 wood table surface for 20 years	Not mentioned	Tox: EDIP97 and USES. Others not mentioned	No	Cradle-to-grave
61	Bernesson et al.	2006	A limited LCA comparing large- and small-scale production of ethanol for heavy engines under Swedish conditions	Sweden	Scopus	Energy	Ethanol	Wheat grain	Sweden	Fermentation	Sweden	X				1	1	0	1	1	0	1	0	0	0	0	0	0	0	0	0	0	0		Analyse whether the use of a small-scale production system reduced the environmental load in comparison to a medium- and a large-scale system	1 MJ of energy in the ethanol fuel delivered to the final consumer	Not mentioned	GWP: IPCC 2001. Others not mentioned	No	Cradle-to-gate
62	Berg and Lindholm	2005	Energy use and environmental impacts of forest operations in Sweden	Sweden	Scopus	Commodity	Timber	Swedish forest biomass	Sweden	Forestry	Sweden	X				1	1	0	1	1	0	1	0	0	0	0	0	0	0	0	0	0	0		1) Identify the most significant processes in terms of input of energy and outputs of timber and emissions, 2) Compare forestry in three parts of Sweden, 3) Provide inventory data	1 m3 s.u.b. delivered to the mill	Not mentioned	Not mentioned	No	Cradle-to-gate
63	Bernesson et al.	2004	A limited LCA comparing large- and small-scale production of rape methyl ester (RME) under Swedish conditions	Sweden	Scopus	Energy	Rape methyl ester (RME)	Winter rape seed	Sweden	Extraction, transesterification	Sweden	X				1	1	0	1	1	0	1	0	0	0	0	0	0	0	0	0	0	0		Analyse whether the use of a small-scale RME production system reduced the environmental load in comparison to a medium- and a large-scale system.	1 MJ of energy in the RME fuel delivered to the final consumer	Not mentioned	GWP: IPCC 2001. Others not mentioned	No	Cradle-to-gate
																																														0

## Sheet: LCC
Bibliographic information						Product information		Production information				Method Addressed																	Other
																					Study design					Cost for whom? (Perspective)
Ref.	Author	Year	Title	Author affiliation (main author country)	Source	Product type (energy/commodity/construction etc)	Product (e.g. FT diesel)	Feedstock (plant (e.g. corn), fraction (e.g. waste/GROT) management (e.g. perennial))	Cultivation location (e.g. Sweden)	Conversion technology (e.g. gazification)	Conversion location (e.g. Sweden)	LCA	LCC	SLCA	LCSA	$	EUR	RMB	£	Qualitative discussions	Goal/purpose	FU	LCC type (kolla vad som sägs)	Allocation Method	Boundaries	Company / Producer	Society	Consumer	Cost for whom? (Company, Society, Consumer)	Cost for what? (Direct costs, taxes, externalities)	Type of costs	Economic perspective (corporate / social)	Economic perpective (cost / price)	Comments
1	Strazza et al.	2015	Life Cycle Assessment and Life Cycle Costing of a SOFC system for distributed power generation	Italy	Scopus	Energy	Electricity	Biogas / Wood	Europe	Fuelcell	Europe	1	1				1				The aim of this paper is to evaluate both potential environmental impacts and potential costs of the operation of a 230 kW Solid Oxide Fuel Cell (SOFC) system.	1 kWh net of electricity generated by the SOFC system during its lifespan	Attributional	Volume	Cradle-to-grave	1		1	Company & Consumer	Direct costs	Fuel costs, maintanance costs, investment costs	corporate	cost
2	Babaizadeh et al.	2015	Life cycle assessment of exterior window shadings in residential buildings in different climate zones	USA	Scopus	Construction	Shading materials	Wood	N/a	N/a	N/a	1	1			1					Compare differnt materials for window shading in small residential buildings.	A unit of shading with the required dimensions and thicknesses shown being in service for 40 years.	Attributional	N/a	Cradle-to-grave			1	Consumer	Direct costs & capital costs	Purchase, installation, time value of money	corporate	cost	Using ASTM international standard life-cycle cost (LCC) method
3	Hong et al.	2015	Environmental and economic impact of furfuralcohol production using corncob as a raw material	China	Scopus	Commodity	Furfuralcohol	Food crop	China	N/A	China	1	1			1				Compression of corncobs to reduce impacts from transportation. Transportation distance vs. Profit.	Aims to quatify the environmental and economic impacts of furfural and furfuralcohol production, identify the main pollution procuecces and substances, improve potentials, and build a database on the furfural industry.	The production of 1 t of furfuralcohol	Attributional	Mass	Cradle-to-gate	1			Company // Industry	Direct costs	Direct cost inkl. cost such as taxes and infrastructure fee	corporate	cost
4	Santoyo-Castelazo & Azapagic	2014	Sustainability assessment of energy systems: integrating environmental, economic and social aspects	UK	Scopus	Energy	Electricity	Biomass	N/a	Steam Turbine	Mexico	1	1	1	1	1				Capital costs, total annualised costs, levelised costs	Presents a new decision-support framework for sustainability assessment of energy systems and to illustrate this with the case of Mexico.	per scenario of the future energy system of Mexico	Attributional (?)	N/a	Cradle-to-Grid		1		Society	Direct cost, capital costs etc	Capital costs, total annualised costs, levelised costs	Social	cost	Biomass only a small part. Mainly an illustrative case.
5	Han et al.	2014	Variability of optimal solutions for building components based on comprehensive life cycle cost analysis	USA	Scopus	Construction	Window frame	Wood	N/a	N/a	N/a	1	1			1				Capital costs, Maintanance costs etc.	Present a framework of building systems optimization, illustrate it with a case for different building components.	Per window and differnt time span.	Attributional	N/a	Gate-to-Gate	1			Company	Direct costs	Capital costs, energy use, maintanance, (NPV)	corporate	cost	Wood componens is only a minor part.
6	Meyer & Weiss	2014	Life cycle costs for the optimized production of hydrogen and biogas from microalgae	Germany	Scopus	Energy	Hydrogen / Biogas	Algae	Germany / Spain	Anaerobic digestion	Germany / Spain		1			1					The study answers the question under which conditions hydrogen and biogas could be produced at (or below) market prices and how production costs can be reduced	1 MJ of the produced fuel	Attributional	Cost allocation	Cradle-to-Gate	1			Company	Direct costs		corporate	cost
7	Wang et al.	2014	Combined methodology of optimization and life cycle inventory for a biomass gasification based BCHP system	China	Scopus	Energy	Building cooling, heating, and power	Agricultural residues	China	Gazification	China	1	1			1					Optimization of a biomass based building cooling, heating, and power system.	$ / MWh	Attributional	N/a	Cradle-to-Grave	1			Company	Direct costs	Fuel cost, labor cost, depreciation cost and maintenance cost. Minus income from energy surplus etc.	corporate	cost
8	Albrecht et al.	2013	An extended life cycle analysis of packaging systems for fruit and vegetable transport in Europe		Scopus	Commodity	Packaging system	Wood	N/a	N/a	N/a	1	1	1		1					The study analyses and compares transport packaging systems for fruit and vegetable transport in Europe.	Distribution of 15 kg of fruits/vegetables in 3,333,350 filled boxes/crates	Attributional	N/a	Cradle-to-Grave	1			Company	Direct costs		corporate	cost
9	Kantola & Saari	2013	Renewable vs. traditional energy management solutions e A Finnish hospital facility case	Finland	Scopus	Energy	Heating	Wood / Biogas	N/a	N/a	N/a	1	1			1					The aim of the study was to calculate the life-cycle costs (LCC) of 12 energy management systems and compare the prices.	The energy system for a hospital, 20 years lifetime	Attributional	N/a	Cradle-To-Grid	1			Company (Hospital)	Direct costs	Maintanance, fuel, investment (NPV)			Not a case
10	Trendewicz &. Braun	2013	Techno-economic analysis of solid oxide fuel cell-based combined heat and power systems for biogas utilization at wastewater treatment facilities	USA	Scopus	Energy	Heating/ Power	Wastewater	USA	Mesophilic digestion	USA		1								The objective of the paper is to investigate the technical and economic benefits of the cogeneration pathway for biogas utilization with focus on solid oxide fuel cell (SOFC) technology.	Cost per component, small, medium, large scale.	Attributional	N/a	Gate-To-Gate	1			Company	Direct and indirect cost				Waste water
11	La Rosa et al.	2013	Life cycle assessment of a novel hybrid glass-hemp/thermoset composite	Italy	Scopus	Commodity	Glass fibre composite	Non-food crop	UK		Italy	1	1				1				Identify the main cost contributions of the elbows and find ways to optimise them.	The function of one elbow fitting used in the sea water cooling pipeline of a Sicilian chemical plant, with an estimated life of 20 years	Attributional	Not necessary	Cradle-To-Grave	1			Company	Direct costs	Material, labor and waste
12	Zhang et al.	2013	Environmental and economic assessment of integrated systems for dairy manure treatment coupled with algae bioenergy production	USA	Scopus	Energy/Commodity	Electrcity / fertilizers	Manure	USA	Anaerobic digestion	USA	1	1			1					Investigate integrated algae bioenergy production and nutrient management on small dairy farms	Management of as much manure is produced on a 100-cow farm	Attributional	N/a	Gate-To-Grid/Gate	1			Company	Direct costs	Capital costs, annual operational costs, and annual revenues (NPV)
13	Rehl & Müller	2013	CO2 abatement costs of greenhouse gas (GHG) mitigation by different biogas conversion pathways	Germany	Scopus	Energy	Biogas	Waste	Germany	Anaerobic digestion	Germany	1	1				1				The goal of this study was to identify the most ecological and economical use of a given resource (organic waste from residential, commercial and industry sectors) using one specific treatment technology (anaerobic digestion) but applying different energy conversion technologies.	EUR / MJ	Attributional/ Hybrid?	N/a	Cradle-To-Gate	1			Company	Direct costs				Looks at abatement costs with differnt use of biogas. Is this ok? Some marginal data was used.
14	Caldeira-Pires et al.	2013	Sustainability of the Biorefinery Industry for Fuel Production	Brazil	Scopus	Energy	Biofuels	Soybeen / Palm Oil / Sugercane	Brazil	Destilation etc.	Brazil	1	1			1					The article describes some recent developments in the characterization of the environmental and economic impacts of the production of 3 differnt biofuels from different biomass sources.	The use of 1 kg of anhydrous ethanol mixed with gasoline (25% v/v in gasoline) and used in medium-size passenger vehicles	Attributional	Several methods are discussed	Well-to-Wheel	1			Company	Direct costs				also a Structural Path Analysis SPA // Unclear with the allocation
15	Ribeiro et al.	2013	A life cycle framework to support materials selection for Ecodesign: A case study on biodegradable polymers	Portugal	Scopus	Commodity	Polymers	N/a	N/a	N/a	N/a	1	1				1			Result as a integrated comparison of economic and environmental life cycle performance	Present a comprehensive life cycle framework to support Ecodesign in material selection. Test it in a case for biopolymers.	EUR / 200,000 parts	Attributional	N/a	Gate-to-Grave	1			Company	Direct costs				Test of a new framework.
16	Ong et al.	2012	Life cycle cost and sensitivity analysis of palm biodiesel production	Malaysia	Scopus	Energy	Biodiesel	Non-food crop	Malaysia	Continuous transesterification process	Malaysia		1			1					This study assesses the limiting factors which impede the development of biodiesel such as feedstock price, production cost, fossil fuel price and taxation policy.	A 50 ktons palm biodiesel production plant, operating period of 20 years // $/litre	Attributional	N/a	Cradle-to-Gate	1			Company	Direct costs	(Payback period) (Present Worth Factor), Feedstock, maintanance, capital costs
17	Hernandez & Giachetti	2012	Feasibility evaluation of a biodiesel distribution system using a location-distribution model: a study of the Colombian biofuel policy	Colombia	Scopus	Energy	Biodiesel	Non-food crop	Colombia	N/a	Colombia		1			1					To analyse the Colombian biodiesel policy given their current infrastructure, feedstock supply and demand by using LCC for the different alternatives.	Production and investment costs from prodocution and distribution $/gallon	Attributional	N/a	Well-to-Tank		1		Society	Direct costs	Production, invesment, transport costs etc.
18	Schoen & Bagley	2012	Biogas production and feasibility of energy recovery systems for anaerobic treatment of wool-scouring effluent	USA	Scopus	Energy	Biogas	Wool	USA	Anaerobic digestion	USA		1			1					The technical and economic feasibility of anaerobic digestion to produce biogas at a small wool-scouring facility in the United States was examined.	N/a	Attributional		Gate-to-Gate	1			Company	Direct costs	Capital, maintanace, etc. Calculated as saving compared to using natural gas.
19	Badger et al.	2011	Techno-Economic analysis: preliminary assessment of pyrolysis oil production costs and material energy balance associated with a transportable fast pyrolysis system	USA	Scopus	Energy	Bio-oil	Wood	USA	Pyrolysis	USA		1			1					Investigate the economic performance of pyrolysis oil production.	$/gal	Attributional		Cradle-to-Gate	1			Company	Direct costs	Capital costs. Maintenance, wages etc - divided into fixed and variable costs. Costs for loan
20	Brandão et al.	2010	A Life-Cycle Approach to Characterising Environmental and Economic Impacts of Multifunctional Land-Use Systems: An Integrated Assessment in the UK	Italy	Scopus	Food/Energy/Timber	Food/Energy/Timber	Wheat / Oilseed rape / Scots Pine / Willow	UK	N/a	UK	1	1						1		The focus of this study is the environmental and economic impact of the cultivation of food, energy and forestry crops, to inform policies on land use to produce food and energy crops.	One hectare of land for one year	Attributional	Not needed	Cradle-to-Gate	1			Company	Direct costs	"Conventional LCC"
21	Shrake et al.	2010	A comparative analysis of performance and cost metrics associated with a diesel to biodiesel fleet transition	USA	Scopus	Energy	Biodiesel	N/a	N/a	N/a	N/a		1			1					This research examined the major areas of concern that arise with transitioning fleets from ULSD to B5 with the goal of alleviating those concerns with quantitative results from an actual fleet implementation and transition.	$/gallon	Attributional		Well-to-Wheel	1			Company	Direct costs	Fuel cost compared to conventional diesel
22	Schroeder & Majumdar	2010	Feasibility analysis for solid oxide fuel cells as a power source for railroad road locomotives		Scopus	Energy	Biodiesel	N/a	N/a	Gasification	USA		1			1					Determining the feasibility of a solid oxide fuel cells power system when compared with the standard internal combustion engine/generator power systems currently in-use.	$/MWh	Attributional		Gate-to-Gate	1			Company	Direct costs	Annulized cost, present value
23	Lou et al.	2009	Life cycle assessment and life cycle costing of bioethanol from sugercane in Brazil	The Netherlands	Scopus	Energy	Ethanol	Non-food crop	Brazil	Fermentation	Brazil	1	1			1				Sensitivity analysis with changes in sugercane price and discussion of the importance of the oil price	Comparission between driving on gasoline and ethanolfuels. But also a comparission between ethanol from two differnt production methods.	$/km	Attributional	Economic	Well-to-Wheel	1			Company	Direct costs	Steady-state cost model, only production costs.			In reality taxes and the market have a high impact on the price. In accordance to the production cost
24	Thomas	2009	Fuel cell and battery electric vehicles compared	USA	Scopus	Energy	Ethanol	Wood	N/a	N/a	N/a		1			1					This paper evaluates the primary transportation alternatives and determines which hold the greatest potential for averting societal threats.	Drivelines for 320 km Range and 480 km Range	Attributional		Gate-to-Wheel		1		Society	Direct costs	Vehicle/capital cost, fuel cost, fueling infrastructure cost
25	Colodel et al.	2009	R&D decision support by parallel assessment of economic, ecological and social impact — Adipic acid from renewable resources versus adipic acid from crude oil	Germany	Scopus	Commodity	Adipic acid	"Renewable recources"	N/a	N/a	N/a	1	1	1			1				The study proposes the earlier application of the eco-efficiency concept, namely the R&D stage of a product. Together with the economic and ecological assessment, the social impacts were analysed in the production of adipic acid from renewable resources.	1kg adipic acid	Attributional		Gate-To-Gate	1			Company	Direct costs	"Product value"
26	Karki et al.	2008	Environmental Implications of Renewable Distributed Generation Technologies in Rural Electrification	USA	Scopus	Energy	Biogas	N/a	India	Gasification	India		1			1					In this article, the cost-effectiveness of renewable DG sources (i.e., photovoltaics, small-scale wind turbines, and biomass gasifiers) are assessed and compared with centralized generation for the case of a rural and isolated island in the western state of India	$/kWh	Attributional		Cradle-To-Grid		1		Society	Direct costs				Calculated with the Hybrid Optimization Model for Electric Renewables (HOMER) model
27	Zhou	2007	Life cycle sustainability assessment of fuels	China	Scopus	Energy	Ethanol	Food crop	China	N/a	China	1	1					1			The paper gives an overview of the potential on multi-criteria assessment of fuels	200 000 driving distance of vehicle	Attributional		Well-to-Wheel	1			Consumer	Direct costs
28	Hu et al.	2004	Net energy, CO2 emission, and life-cycle cost assessment of cassava-based ethanol as an alternative automotive fuel in China	China	Scopus	Energy	Ethanol	Food crop	China	Destillation	China		1					1			The subject of this paper is to evaluate and compare the net energy, CO2 emission and its external cost to society, and production cost of CE and CGbased on a lifecycle approach	RMB/MJ	Attributional		Well-to-Wheel		1		Society	Direct costs and external costs for CO2		Social
29	Zhang et al.	2003	Life cycle economic analysis of fuel ethanol derived from cassava in southwest China	China	Scopus	Energy	Ethanol	Food crop	China	Destillation	China		1			1					Implement a data modell in the case of cassava based ethanol in China	A lifetime driving distance of 120,000 miles	Attributional	Economic	Cradle-To-Grave		1		Society	Direct costs	Feedstock, production, use
30	Morgan & Kay	2001	Selection of Noise Barrier Material	USA	Scopus	Construction	Noise Barrier	Wood	USA	N/a	USA		1								Determine the service lives of the various noise barrier materials and products currently in use in Illinois and to develop a life cycle cost model for evaluation of alternative materials.	$ / m2 of Noise Barrier	Attributional		Cradle-To-Use	1			Company	Direct costs

## Sheet: SLCA
Bibliographic information						Product information		Production information				Assessment Categories															Study design
												Impact categories (+ or -)									Stakeholder categories
Ref.	Author	Year	Title	Author affiliation (main author country)	Source	Product type (energy/commodity etc)	Product (e.g. FT diesel)	Feedstock (plant (e.g. corn), fraction (e.g. waste/GROT) management (e.g. perennial))	Cultivation location (e.g. Sweden)	Conversion technology (e.g. gazification)	Conversion location (e.g. Sweden)	Human Rights	Health and Safety	Work Conditions	Governance	Socio-Economic Reprecussions	Cultural Heritage	Other	Qualitative discussions	Comment	Workes/Employees	Local community	National society	Global Society	Consumers	Value chain actors	Goal/purpose	Negative and Positive impacts?	FU (e.g. per kg product)	Methods used	Boundaries (e.g. cradle to grave)	Other limitations
1	Ekener-Petersen et al.	2014	Screening potential social impacts of fossil fuels and biofuels vehicles	Sweden	Scopus	Energy	ethanol and biodiesel	sugar cane (ethanol), wheat (ethanol), maize (ethanol) and rapeseed (biodiesel)	Brazil (sugar cane), France (wheat and maize), USA (maize) and Lithuania (rapeseed)			Indigenous rights; High conflicts; Gender equity; Human health issues	Injuries and fatalities; Toxics and hazrds	"Labour rights and decent rights": Child labour; Forced labour; Excessive working time; Wage assessment; Poverty; Migrant labour; Freedom of association etc.; Unemployment; Labour laws	Legal systems: Corruption			"Community Infrastructure": Hospital beds; Drinking water; Sanitation; Children out of school; Smallholder or conventional farms		The impacts were defined by the SHDB and was in 5 Social categories, with in total 22 social themes (as listed here)	x	x	X	?		?	1. Screening assessment of social and socioeconomic impacts of biofuels and fossil fuels, focusing on identifying hotspots. 2. Also, to apply and evaluate S-LCA in the context of vehicle fuels and evaluate the SHDB.	Only negative, considering hotspots for risks		Social hotspots database (SHDB) was the main source of data. Two stakeholder workshops were held to discuss the selection of fuels to study, methodology and conclusions. Results were focusing on the high and very high risk results only. Results were partly presented as aggregates (i.e. number of high and very high risk impacts).	Stages covered were: production/cultivation; refining/processing; and transport. Fuels used within the EU with particular focus on northern Europé and Sweden	The SHDB is based on sectors (57 sectors, same as in GTAP). Data related to biofuel production are found within larger sectors. The study uses information from a previous study stating that sugar cane ethanol production is included in "chemicals, rubber and plastic sector"; wheat and maize ethanol in "food processing"; and biodiesel in "vegetable and oilseeds" sector. This results in uncertain da…
2	Manik et al.	2013	Social life cycle assessment of palm oil biodiesel: a case study in Jambi Province of India	USA	Scopus	Energy	biodiesel	palm oil	Indonesia	not covered		Criteria: Free from the employment of child labour; Free from the employment of forced labour; Equal opportunities, free from discrimination		Criteria: Freedom of association and collective bargaining; Fair salary; Decent working hours; Occuptational health and safety; Social benefit	Criteria: Public commintments to sustainability; Fair competition; Free from corruption	Criteria: Contribution to local employment; Contribution to economic development; Food security; Horizontal conflict; Transfer to technology and knowledge	Criteria: Land aquisition, delocalisation, migration; Respect on cultural hertigae and local wisdom; Respect on customary right of indigenous people; Community engagement; Safe and health y living condition; Access to material resources; Access to non-material resources; Transparency on social/environmental issues			Based on UNEP/SETAC guidelines	X	X	X	?		X	1. Assess social implications of an exisiting palm oil production system	Negative and positive	Not applicable	Case study adotpion the UNEP/SETAC guidelines. Expert survey for weighting, literature review and questionaire to stakeholders to illustrate gaps between expected and perceived quality for each social criterion.	Covering cradle to port: land clearing, oil palm plantation, palm oil milling, and transportation of crude palm from mill to sea port.	Inhernet uncertainty in weighting. Some criteria may have beed harder than others for stakeholders to have opinions on/to see the long term consequences for (e.g. food security). Interpretation of results - working conditions was pointed out as important, even though not significantly "larger" than e.g. governance. The assessment is based on whether perceived conditions meet expectations - not ce…
3	Weldegiogirs and Franks	2014	Social dimensions of energy supply alternatives in steelmaking: comparison of biomass and coal production scenarios in Australia	Australia	Scopus	Energy	charcoal from biomass	Radiata pine planation forest; Mallee eucalypt revegetation on agricultural land	Australia					Employment; Workplace health and safety				Land use	Identified stakeholder issues - pine: Forest utilisation values; Amenity and traffic; Water management; Community health and safety from charcoal plant; Land values; Community identity. Identified stakeholder issues - eucalyptus: Investment and profitability uncertainty; Soil erosion and compacting; Food security; Community identity; Community health and safety from charcoal plant.	Impact indicators were chosen based on literature review, issues identified by stakeholder representative organisations at local and regional scale (published mtrl), and availability of regionalised data. Excluded due to lack of data were: Business and services development; Ipacts on land value; Amenity and community helath; Workforce location impact. Due to difficlulties in comparison and less r…	X	X				?	1. Adapts social life cycle assessment methodologies to 2) analyse the social dimensions of energy supply alternatives in steelmaking using regionalised production sceanrios in Australia." (A third alternative being metallurgical coal).	Positive and negative	one tonne of steel (alos considering scale effects)	literature review	cradle to gate: from production of biomass to the blast furnace that produces steel. Only some components of the plantation establishment are considered due to lack of data for regionalised parameters. Transportation is not included, niether potenital use of forestry residues.	For the qualitative discussions issus were identified through secondary sources, and thus may not fully represent the diversity. Assumptions made as the scenarios are hypothetical. Harvesting of Mallee is not establised and uncertainties thus higher in these assumptions.
4	Ren et al.	2015	Prioritization of bioethanol production pathways in China based on life cycle sustainability assessment and multicriteria decision-making	Italy	Scopus	Energy	bioethanol	wheat; corn; cassava	China					Social benefits		Contribution to economic development; Food security				Based on UNEP/SETAC guidelines, but possibility to select criteria.	X	X	X	?		X?	1. Develops a generic methodology (Combines LCSA and MCDM for sustainability assessment). Develops a method for quantifying the social criteria. 2. Examines three bioethanol production scenarios with the objetive to help the stakeholders to select the most sustainable pathway for bioethanol produciton.	Positive and negative	1 tonne bioethanols	Stakeholders are invited to assess the SLCA criteria performance qualitatively. Fuzzy theory to transfer qualitative information into quantitative. Stakeholders workers, value chain actors, local community and society (general public) were invited to assess the social performance in a symposium, and a final consensus is achieved. The social performance evaluation is based on multiple stakeholders…	agricultural crop production, bioethanol production, transportation of crops from the agricultural center to the plant; and transportation of bioethanol from the plant to the market.	Limited number of criteria. Only based on stakeholder judgements.
5	Hu et al.	2014	Economic, environmental and social assessment of briquette furl from agricultural residues in China - A study on flat die briquette using corn stalk	China	Scopus	Energy	biomass briquette fuel	corn stalk	China	drying, chopping and briquetting	China			Utilisation of agricultural wastes	Energy security	Rural development (incl. Job creation)				The social aspects were many times related to environmental impacts, e.g. using agricultural wastes gives less environmental pollution from discarded waste; energy security issues leads to reduced CO2 and SO2emissions, etc.	X	X	X (energy security)			X	1. Assess environmental, social and economical impacts	Positive (feels like the categories are chosen to illsutrate positive social impacts…)	not relevant for the social assessment. Different Fus used for the environmental assessment	Not clear for the social assessment, seems like a rough literature study, qualitative descriptions.	the environmental assessment covered corn stalk production, corn stalk transportation, corn stalk briquetting, briquette fuels distribution, briquette fuel combustion. The social assessment focused use and production value chain	No clear analysis of limitations
6	Stamford and Azapagic	2014	Life cycle sustainability assessment of UK electricity scenarios to 2070	UK	Scopus	Energy	electricity	wood and Miscanthus pellets	Miscanthus: UK	debarking, chipping, drying, pelleting	UK (?)	Intergenerationel equity (Use of abiotic resources (elements); Use of abiotic resources (fossil fuels); volume of radioactive waste to be stored; Volume of liquid CO2 to be stored)	Human health impacts (worker injuries, human toxicity potential, total human health impacts from radiation); Large accident risk (fatalities due to large accidents);	Provision of employment (direct employment, total employment)	Energy security (amount of importedfossil fuel potentially avoided, diversity of fuel supply mix, fuel storage capabilities); Nuclear proliferation (Use of non-enriched uranium in a reactorcapable of online refuelling, use of reprocessing, requirement for enriched uranium)						X	X	X	?			1. Assess the life cycle sustainability of different electricity scenarios in UK 2070.	Positive and negative	1 TWh	assumptions and data inventorying	cradle-to-grave. For biomass: cultivation and harvetsing, processing, drying, pelletisation, transport, plant contrsuction - operation - decomissioning	future techologies not commercial today are not considered due to lack of data. Uncertainty of technological development.
7	Souza et al	2016	Social life cycle assessment of first and second-generation ethanol production technologies in Brazil	Brasil	Scopus	Energy	Ethanol	Sugarcane	Brasil				Health and Safety: occupational accidents (number of occupational accidents)	Local Employment: Job creation (number of jobs); Fair salary: wage profile (avarage wage + wage value profile); Equal opportunities/discrimination: education profile (education degree profile); gender profile (Woman in the labour force participaton rate)							x	x					1. This paper aims to develop and apply a methodological framework to 2) assess the social effects of present and future sugarcane biorefineries considering vertically integrated production systems	Positive and negative (but with a tendency to highlight assessment from a positive point of view e.g. which scenario creates more jobs rather than less jobs etc.)	These results could also be converted into an energy basis, i.e., job creation and accidents would be expressed per joules of ethanol. In this study, however, social effects will not be allocated to a single product; on the other hand, they will be interpreted as the overall effect of different biorefinery technologies due to a change in the ethanol final demand of R$ 1 billion on the entire supp…	Two step hybrid SLCA-model integrating (1) processed-based (LCA) approach (to describe specific technologies) and (2) input-output based (IOA) approach to estimate social effects on the supply chain in brazilian economy. 4 (see underlined) of 31 subcategories from UNEP/SETAC SLCA used. Data source: Quantitative data from government + modelling (desktop-research)	From sugarcane planting to ehtanol use (including direct and indirect suppliers of sugarcane refineries).	Present and future sugarcane biorefineries focusing specifically on workers as stakeholder group. System boundary=brazilian economy.

## Sheet: LCSA Studies
Bibliographic information						Product information		Production information				Method Addressed				LCA
																LCA impact category																				Study design						Reviewed Impact Categories
Reference	Author	Year	Title	Author affiliation (main author country)	Source	Product type (energy/commodity etc)	Product (e.g. FT diesel)	Feedstock (plant (e.g. corn), fraction (e.g. waste/GROT) management (e.g. perennial))	Cultivation location (e.g. Sweden)	Conversion technology (e.g. gazification)	Conversion location (e.g. Sweden)	LCA	LCC	SLCA	LCSA	GWP	Energy Use	AD	AP	EP	OD	POCP	Particles	dLU	dLUC	iLUC	TP	WD	Resource use	Endpoints	Biodegradability	Gross caloric values	Biodiv	Qualitative discussions	Total number reviewed	Goal/purpose	FU	LCA type?	LCIA Method	Reason for impact category selection?	Boundaries	Currency (LCC Cost)	Annualized costs	Levelized Costs	Capital costs	IRR	access to markets	NPV	Total
1	Keller et al.	2015	Integrated life cycle assessment-A practical approach applied to biorefineries	Germany	Scopus	Energy, Commoditiies	Ethanol, Resin	Straw	Germany/Europe	Cellulosic Ethanol	Germany/Europe	x	x	x	x	1	1	1	1	1	1	1							1						8	We developed the methodology of integrated life cycle sustainability	tonne biomass	?	Recipe	n/a	cradle-to-grave				1	1	1	1	4
2	Vinyes et al.	2013	Application of LCSA to used cooking oil waste management	Spain, Brazil	Scopus	Commoditiy/waste	Used Cooking oil	Veg. Oil	Europe	Mediterranean	Mediterranean	x	x	x	x	1	1	1	1	1	1	1					1								8	The purpose of this study is to compare the sustainability of three domestic UCO collection systems:through schools (SCH), door-to-door (DTD), and through urban collection centres (UCC), to determine which systems should be promoted for the collection of UCO in cities in Mediterranean countrie	Collect UCO from 10 000 inhabitants for 1 year in Barcelona		CML 2001	(all from CML)	Cradle-to-grave	1							1
3	Santoyo-Castelazo & Azapagic	2014	Sustainability assessment of energy systems: integrating environmental, economic and social aspects	UK	Scopus	Energy	Electricity	Biomass	N/a	Steam Turbine	Mexico	x	x	x	x	1		1	1	1	1	1	1				1								8		per scenario of the future energy system of Mexico		CML2001	N/A		1	1	1	1				4
4	Ren et al.	2015	Prioritization of bioethanol production pathways in China based on life cycle sustainability assessment and multicriteria decision-making	Italy	Scopus	Energy	Bioethanol	Food crop	China	N/a	China	x	x	x	x	1			1				1				1							difficult do use the MCDM method	4	1)combining the life cycle sustainability assessment (LCSA) framework and the multicriteria decision-making (MCDM) methodology for sustainability assessment and (ii) ning the most sustainable scenario for bioethanol production in China according to the preferences of the decision-makers/stakeholders.	1 t ethanol	alca	Recipe	stakeholders chose the most "relevant"	well-to-tank	1							1
5	Colodel et al.	2009	R&D decision support by parallel assessment of economic, ecological and social impact — Adipic acid from renewable resources versus adipic acid from crude oil	Germany	Scopus	Commodity	Adipic acid	"Renewable recources"	N/a	N/a	N/a	x	x	x	x	1	1																	6 reviewed, only two shown in article	2	Show results from an EU project (no real goal)	1 kg of adipic acid	?	?	?	?								0
6	Albrecht et al.	2013	An extended life cycle analysis of packaging systems for fruit and vegetable transport in Europe	Europe	Scopus	Commodity	Packaging system	Wood	N/a	N/a	N/a	x	x	x	x	1	1	1	1	1		1													6	In this study, the most common European fruit and vegetable transport packaging systems, namely single-use wooden and cardboard boxes and re-useable plastic crates, are analyzed and compared considering environmental, economic, and social impacts.	boxes to transport 1000 tonnes of goods 5 times	Clca (system expansion)	CML	none	cradle-to-grave	1							1
[truncated: 57 more columns]
